# Issues and Events

## ADA Events

59th Annual Advanced Postgraduate Course  
17–19 February 2012  
Hyatt Regency San Francisco  
San Francisco, California  
Contact: Shirley Ash  
E-mail: sash@diabetes.org

2012 Diabetes Professional Educators Conference  
9–10 March 2012  
Country Springs Conference Center  
Waukesha, Wisconsin  
Contact: Penny Kasprzak  
E-mail: pkasprzak@diabetes.org

27th Clinical Conference on Diabetes  
24–27 May 2012  
Hyatt Regency Coconut Point  
Bonita Springs, Florida  
Contact: Pauline Lowe  
E-mail: plowe@diabetes.org

72nd Scientific Sessions  
8–12 June 2012  
Pennsylvania Convention Center  
Philadelphia, Pennsylvania  
Web site: <http://scientificsessions.diabetes.org>

73rd Scientific Sessions  
21–25 June 2013  
McCormick Place Convention Center  
Chicago, Illinois  
Web site: <http://scientificsessions.diabetes.org>

Contact for information on ADA events: American Diabetes Association, 1701 N. Beauregard St., Alexandria, VA 22311.  
Tel: 800-232-3472, select option 1. Fax: 703-549-1715 or 703-253-4358. E-mail: [professionaleducation@diabetes.org](mailto:professionaleducation@diabetes.org).  
Web site: <http://professional.diabetes.org/ce>.

## Other Events

Circadian Clocks and Metabolic Disease  
2012 UCLA Symposium  
20–22 April 2012  
Lake Arrowhead Conference Center  
Lake Arrowhead, California  
Web site: <http://www.ccmdsymposium.med.ucla.edu>

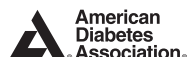

The American Diabetes Association (ADA) is the nation's leading voluntary health organization supporting diabetes research, information, and advocacy. Its mission is to prevent and cure diabetes and to improve the lives of all people affected by diabetes. ADA is the leading publisher of comprehensive diabetes information. Its huge library of books and periodicals covers every aspect of diabetes and diabetes care.

**To join ADA:** Call 1-800-806-7801 or visit [www.diabetes.org/membership](http://www.diabetes.org/membership)

**To subscribe to ADA journals:** Call 1-800-DIABETES or go to [www.diabetesjournals.org](http://www.diabetesjournals.org)

**To order ADA books:** Call 1-800-232-6733 or visit <http://store.diabetes.org>

**To access ADA's library of professional resources:** Go to [professional.diabetes.org](http://professional.diabetes.org)

**For more information about diabetes or ADA programs and services:** Call 1-800-DIABETES. E-mail: [AskADA@diabetes.org](mailto:AskADA@diabetes.org) or visit [www.diabetes.org](http://www.diabetes.org)

**To locate an ADA/NCQA Recognized Provider of quality diabetes care in your area:** Visit <http://web.ncqa.org>

**To join the fight to increase funding for diabetes research, end discrimination, and improve insurance coverage:** Call 1-800-DIABETES or visit [www.diabetes.org/advocate](http://www.diabetes.org/advocate)

**To find out how you can get involved with the programs in your community:** Call 1-800-DIABETES or visit [www.diabetes.org/in-my-community](http://www.diabetes.org/in-my-community)

**To find out about important research regarding diabetes:** Go to [www.diabetes.org/news-research](http://www.diabetes.org/news-research)

**To make a donation or memorial contribution:** Call 1-800-DIABETES or visit [www.diabetes.org/donate](http://www.diabetes.org/donate)
